1 **Idiosyncratic fitness costs of ampicillin-resistant mutants derived from a long-**  
2 **term experiment with *Escherichia coli***

3

4 Jalin A. Jordan<sup>1,2</sup>, Richard E. Lenski<sup>3,4</sup>, and Kyle J. Card<sup>4,5\*</sup>

5

6 <sup>1</sup> Department of Chemistry, Michigan State University, East Lansing, Michigan, United States of  
7 America

8 <sup>2</sup> Perelman School of Medicine, University of Pennsylvania, Philadelphia, Pennsylvania, United  
9 States of America

10 <sup>3</sup> Department of Microbiology and Molecular Genetics, Michigan State University, East Lansing,  
11 Michigan, United States of America

12 <sup>4</sup> BEACON Center for the Study of Evolution in Action, Michigan State University, East  
13 Lansing, Michigan, United States of America

14 <sup>5</sup> Department of Translational Hematology and Oncology Research, Cleveland Clinic Lerner  
15 Research Institute, Cleveland, Ohio, United States of America

16

17 **\*Corresponding author:** Kyle J. Card, [cardkyle1@gmail.com](mailto:cardkyle1@gmail.com)

18

## 19 **Abstract**

20 Antibiotic resistance is a growing concern that has prompted a renewed focus on drug discovery,  
21 stewardship, and evolutionary studies of the patterns and processes that underlie this phenomenon.  
22 A resistant strain's competitive fitness relative to its sensitive counterparts in the absence of drug  
23 can impact its spread and persistence in both clinical and community settings. In a prior study, we  
24 examined the fitness of tetracycline-resistant clones that evolved from five different *Escherichia*  
25 *coli* genotypes, which had diverged during a long-term evolution experiment. In this study, we  
26 build on that work to examine whether ampicillin-resistant mutants are also less fit in the absence  
27 of the drug than their sensitive parents, and whether the cost of resistance is constant or variable  
28 among independently derived lines. Like the tetracycline-resistant lines, the ampicillin-resistant  
29 mutants were often less fit than their sensitive parents, with significant variation in the fitness costs  
30 among the mutants. This variation was not associated with the level of resistance conferred by the  
31 mutations, nor did it vary across the different parental backgrounds. In our earlier study, some of  
32 the variation in fitness costs associated with tetracycline resistance was explained by the effects of  
33 different mutations affecting the same cellular pathway and even the same gene. In contrast, the  
34 variance among the ampicillin-resistant mutants was associated with different sets of target genes.  
35 About half of the resistant clones suffered large fitness deficits, and their mutations impacted major  
36 outer-membrane proteins or subunits of RNA polymerases. The other mutants experienced little  
37 or no fitness costs and with, one exception, they had mutations affecting other genes and functions.  
38 Our findings underscore the importance of comparative studies on the evolution of antibiotic  
39 resistance, and they highlight the nuanced processes that shape these phenotypes.

## 40 **Introduction**

41 Antibiotic resistance is a topic of growing concern. Since the introduction of penicillin, society has  
42 relied on antibiotics to treat many serious bacterial infections. However, a tension exists between  
43 the introduction of new drugs to combat pathogens and the rapid evolution and global spread of  
44 bacteria resistant to these drugs. This “arms race” has threatened the effectiveness of antibiotics  
45 and spurred a renewed emphasis on drug discovery [1], antibiotic stewardship [2], and studies of  
46 the evolutionary processes that give rise to resistance [3].

47         When a bacterium evolves resistance, either by mutation or horizontal gene transfer, it will  
48 have a higher fitness than its sensitive counterparts in an environment containing the antibiotic at  
49 sufficient concentration. Nonetheless, resistance often comes at the cost of a reduced growth rate,  
50 such that sensitive cells outcompete resistant variants in drug-free environments [4–7]. A resistant  
51 genotype’s relative fitness, in both types of environments, is therefore an important measure for  
52 understanding its clinical impact [8]. For example, the fitness effect of a resistance mutation  
53 determines how well it spreads during drug therapy, and its rate of disappearance upon cessation  
54 of treatment [8–10]. However, a strain’s genetic background can also affect the fitness costs of  
55 resistance and therefore alter these dynamics [11–15].

56         In previous papers, we investigated how genetic background affects the phenotypic and  
57 genotypic evolution of drug resistance. We subjected clones, isolated from several laboratory-  
58 evolved populations of *Escherichia coli*, to one of four antibiotics in a single round of selection.  
59 We found that a strain’s genotype sometimes affected both its resistance potential [16] and the  
60 mutational paths by which it evolved resistance [17]. We then examined the competitive fitness of  
61 the tetracycline-resistant mutants [10]. We found that the resistant mutants grew, on average, ~8%  
62 slower than their sensitive counterparts in the absence of the drug, but with significant among-line

63 heterogeneity in these fitness costs. We asked whether this heterogeneity was explained by the  
64 level of resistance conferred by the mutations [7] or some other factors. Our results showed that  
65 the level of resistance did not explain the variation in fitness costs, nor did the genetic background.  
66 Instead, the variation among lines was explained, in part, by different mutations that arose in the  
67 same gene, on the same genetic background, and conferred the same phenotypic resistance.

68 Here, we extend this work to examine the fitness costs of ampicillin-resistant mutants that  
69 evolved from the same parental strains as used in our previous work. As we saw with tetracycline  
70 resistance [10], the ampicillin-resistant mutants are less fit, on average, than their progenitors in a  
71 drug-free environment, and with significant heterogeneity in fitness costs. Once again, neither the  
72 level of resistance conferred by the mutations, nor the different genetic backgrounds can explain  
73 this variation. Instead, the variation in fitness largely reflects different sets of genes in which the  
74 resistance mutations occurred, with some targets associated with high costs and others imposing  
75 little or no cost.

76 Our results largely support other studies, in particular that antibiotic resistance is often, but  
77 not always, a detriment to growth in environments where resistance is not essential for survival.  
78 Nevertheless, there is value in finding and reporting concordant results across different systems  
79 and studies, given the growing problem of antibiotic resistance. The present study also highlights  
80 some subtle, but important, differences from our earlier work. In particular, the variation in the  
81 fitness costs of ampicillin resistance is not explained by different mutations in the same genes, but  
82 rather by mutations affecting different targets. This difference in the source of heterogeneity of  
83 fitness costs between ampicillin and tetracycline resistance emerged despite using the same parent  
84 clones, environment, and experimental protocol in our two studies. We believe this difference  
85 illustrates the value of comparative studies on the evolution of resistance.

## 86 **Materials and Methods**

### 87 *Bacterial strains*

88 The long-term evolution experiment, or LTEE, is described in detail elsewhere [18]. In brief,  
89 twelve populations of *E. coli* were founded from a common ancestral strain, called REL606. These  
90 populations have been propagated for over 30 years and 70,000 bacterial generations by daily 100-  
91 fold dilutions in Davis Mingioli medium supplemented with 25  $\mu\text{g}/\text{mL}$  glucose (DM25).

92 We previously inoculated REL606 and clones isolated at 50,000 generations from four  
93 populations (denoted Ara<sup>-</sup>5, Ara<sup>-</sup>6, Ara<sup>+</sup>4, and Ara<sup>+</sup>5) into replicate cultures of permissive Luria  
94 Bertani (LB) medium [16]. We spread these cultures on a series of agar plates containing two-fold  
95 increasing concentrations of ampicillin. We quantified each strain's evolvability, which we defined  
96 as the maximum increase in resistance from its initial inhibitory concentration during one round  
97 of drug selection [16]. We later sequenced the complete genomes of the resistant mutants that  
98 formed colonies at the highest drug concentrations [17].

99 In this study, we examined the competitive fitness of the mutants. Specifically, we analyzed  
100 four mutants evolved from the LTEE ancestor and three mutants from each derived background,  
101 for a total of 16 mutants (Table S1). Strains REL607, REL10948, and REL11638 were used as  
102 common competitors. REL607 is a spontaneous Ara<sup>+</sup> revertant of REL606 [18], REL10948 is an  
103 Ara<sup>-</sup> clone isolated from population Ara<sup>-</sup>5 at generation 40,000, and REL11638 is a spontaneous  
104 Ara<sup>+</sup> revertant of that clone [19,20]. The Ara marker is selectively neutral in DM25, and it serves  
105 to distinguish competitors during fitness assays because Ara<sup>-</sup> and Ara<sup>+</sup> cells form red and white  
106 colonies, respectively, on tetrazolium-arabinose (TA) indicator agar plates. We used REL607 as  
107 the common competitor for REL606 and the four ampicillin-resistant clones evolved from it, and

108 the 40,000-generation clones as common competitors for the four 50,000-generation clones and  
109 the twelve mutants that evolved from them.

110

### 111 *Fitness assays*

112 We performed competition assays in the absence of antibiotics to quantify the relative fitness of  
113 each ampicillin-resistant mutant and its sensitive parental clone. Fitness was measured under the  
114 same conditions as the LTEE, except the medium contained 250  $\mu\text{g}/\text{mL}$  glucose (DM250). Each  
115 resistant mutant and its sensitive parent competed, in paired assays, against the same common  
116 competitor with the opposite Ara-marker state. To perform the fitness assays, competitors were  
117 revived from frozen stocks and acclimated to the DM250 medium for two days. We then diluted  
118 each competitor 1:200 into fresh medium, and a sample was immediately plated on TA agar to  
119 assess their initial frequencies based on colony counts. We then propagated the cultures for three  
120 days, with 1:100 dilutions in fresh medium each day. On day three, samples were again plated on  
121 TA agar to assess the competitors' final densities. We calculated relative fitness as the ratio of the  
122 realized growth rate of the clone of interest (either a resistant clone or its sensitive parent) to that  
123 of the common competitor. The fitness of a resistant mutant was then normalized by dividing it by  
124 the fitness of the paired assay using its parental strain. The same methods and statistical analyses  
125 were performed to quantify fitness as in Card et. al [10].

126

## 127 **Results**

### 128 *Ampicillin-resistant mutants have reduced fitness in the absence of antibiotic*

129 We first ask whether the ampicillin-resistant mutants are, on average, less fit than their sensitive  
130 parental strains during competition assays in the absence of the drug. The grand mean of the log<sub>e</sub>-  
131 transformed fitness values is  $-0.1108$ , which means the resistant mutants grow on average  $\sim 11\%$

132 more slowly than their parents. This value deviates significantly from the null hypothesis that the  
133 resistant and sensitive strains have equal fitness ( $t_s = 2.9169$ , 15 d.f., one-tailed  $p = 0.0053$ ). It is  
134 interesting, however, that about half of the resistant mutants show little or no fitness costs relative  
135 to their sensitive parents (Figure 1).

136

### 137 *Fitness costs significantly vary among ampicillin-resistant mutants*

138 We measured the relative fitness of each resistant mutant with 5-fold replication. The variation in  
139 fitness among the mutants is far greater than expected from the variation between replicate assays  
140 (Table 1). This result shows that measurement noise cannot explain the variation in fitness costs  
141 among the 16 ampicillin-resistant mutants (Figure 1).

142 As outlined in Card et al. [10], there are several plausible explanations for this variation in  
143 fitness costs, and they are not mutually exclusive. The costs might scale with the level of resistance  
144 conferred by mutations, there could be genetic-background effects, secondary mutations may have  
145 hitchhiked with some mutations that confer resistance, and different resistance mutations may have  
146 idiosyncratic effects. In terms of idiosyncratic effects, the fitness costs could vary across pathways  
147 that confer resistance by different mechanisms, among mutations in different genes in the same  
148 pathway, or even between different mutations in the same gene. We examine these possibilities in  
149 the following sections.

150

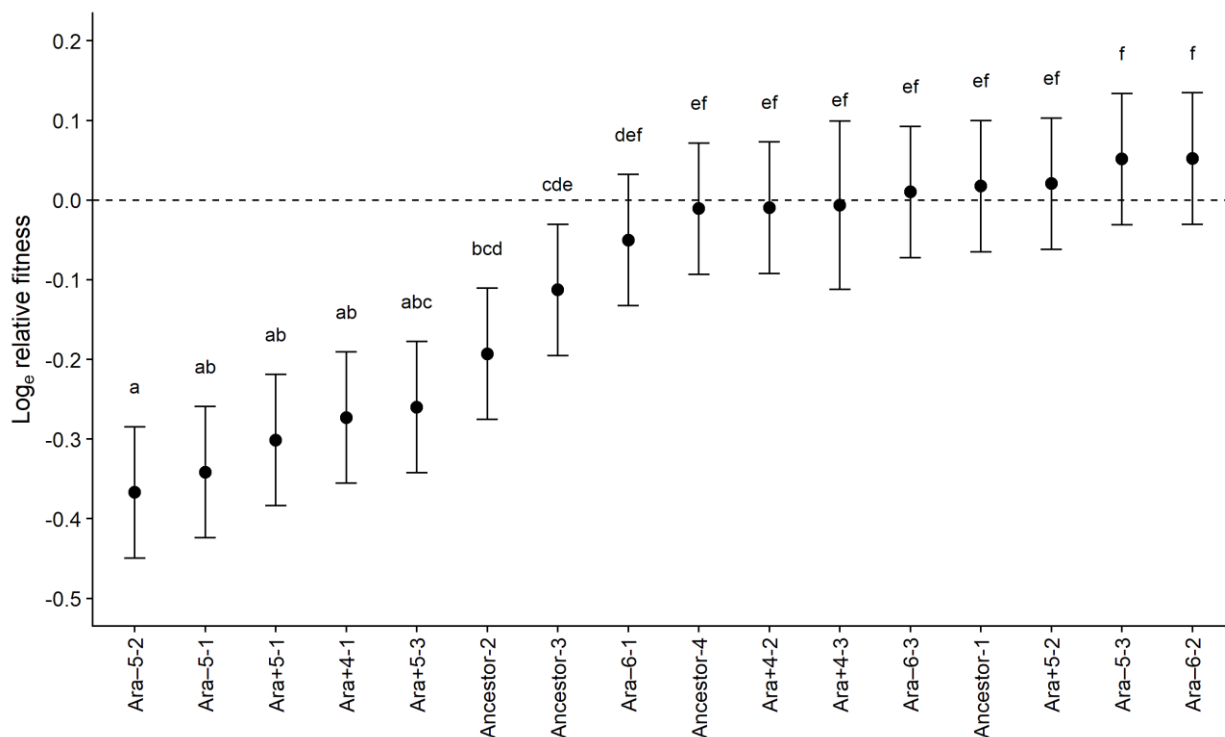

151  
152 **Figure 1.** Fitness of 16 ampicillin-resistant mutants, each relative to its parental strain. The mutants  
153 are arranged from lowest to highest fitness. Each symbol shows the mean  $\log_e$ -transformed fitness  
154 based on five-fold replication of paired assays. Error bars show 95% confidence limits calculated  
155 using the  $t$ -distribution with 4 d.f. and the pooled standard deviation from the ANOVA (Table 1).  
156 Letters above the error bars identify sets of mutants with relative fitness values that do not differ  
157 significantly, based on Tukey's "honest significant difference" test for multiple comparisons. The  
158 dashed line shows the expected relative fitness under the null hypothesis of no cost of resistance.



159 **Table 1.** ANOVA on the  $\log_e$ -transformed fitness estimates of 16 ampicillin-resistant lines, each  
160 measured relative to its sensitive parent.

| Source | SS     | d.f. | MS     | F     | p         |
|--------|--------|------|--------|-------|-----------|
| Line   | 1.7220 | 15   | 0.1148 | 26.04 | << 0.0001 |
| Error  | 0.2777 | 63   | 0.0044 |       |           |
| Total  | 1.9997 | 78   |        |       |           |

161

162 *Level of resistance does not explain the variation in fitness costs*

163 The resistant mutants vary in both the minimum inhibitory concentration (MIC) achieved after a  
164 single round of exposure to ampicillin and the magnitude of the resistance increase relative to their  
165 parental strains (Figure 2). For example, some mutants evolved MIC values that are 2-, 4-, or even  
166 8-fold higher than their progenitors, while two mutants did not achieve even a 2-fold increase in  
167 resistance based on our earlier study [16]. Mutations that provide greater resistance might be  
168 expected to have higher fitness costs [21]. We tested this possibility by examining the correlation  
169 between the  $\log_e$ -transformed fitness values of the 16 resistant mutants and their  $\log_2$ -transformed  
170 MIC values (Figure 2a) and their increases in resistance relative to their parent strains (Figure 2b).  
171 Neither correlation was significant (Figure 2), although the former is in the direction one would  
172 expect if greater resistance was more costly. However, the latter correlation, which shows no trend  
173 at all, is more meaningful because it reflects the relationship between the *change* in resistance and  
174 its associated effect on fitness. In short, we find no support for the hypothesis that the variation in  
175 fitness cost among the mutants depends on the level of resistance conferred by their mutations.

176

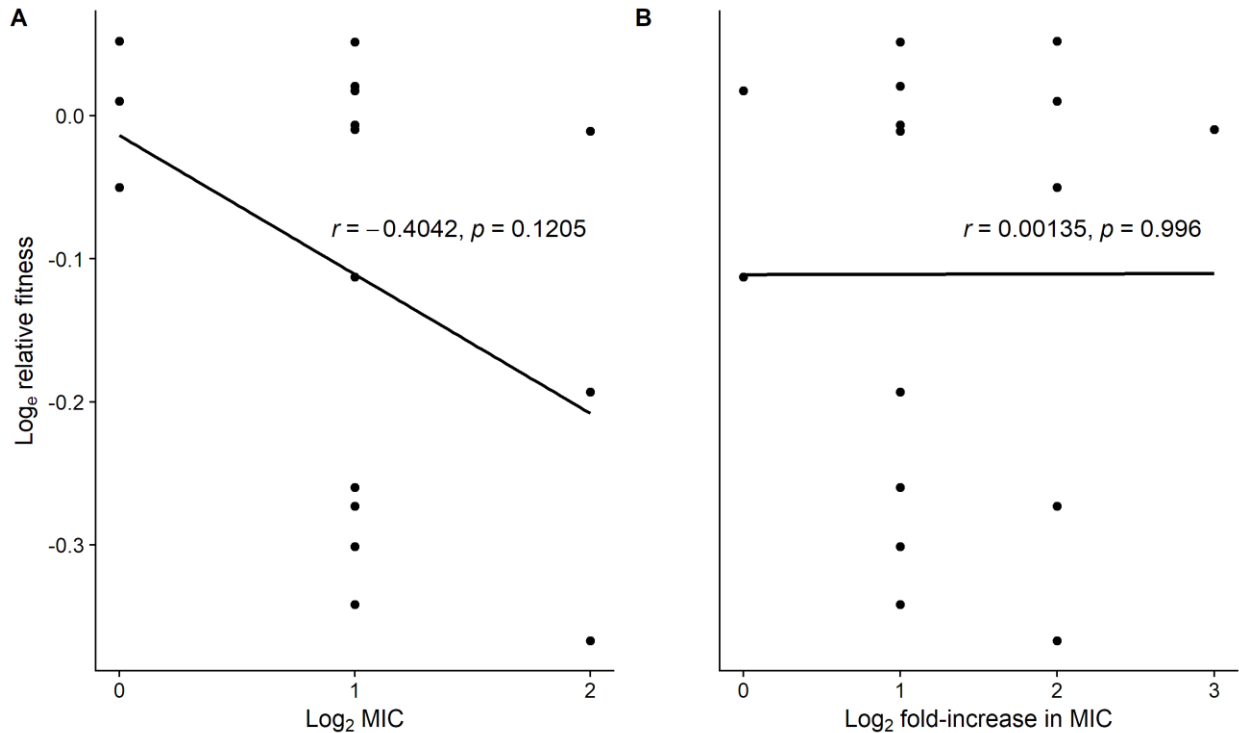

177

178 **Figure 2.** Variation in relative fitness of ampicillin-resistant mutants is not significantly correlated  
179 with their resistance level. Correlation between the mean  $\text{log}_e$ -transformed fitness of 16 ampicillin-  
180 resistant mutants and their (A)  $\text{log}_2$ -transformed minimum inhibitory concentration (MIC), and (B)  
181  $\text{log}_2$ -transformed increase in resistance relative to their parental clones after a single round of drug  
182 selection [16].

183 *Genetic background does not explain the variation in fitness costs*

184 The 16 ampicillin-resistant mutants evolved from five different parental strains. We tested whether  
185 the average cost of resistance varied among the genetic backgrounds or involved an interaction  
186 between the backgrounds and level of resistance conferred by the mutations. However, there was  
187 no significant effect of either the background ( $F_{4,11} = 1.038, p = 0.4310$ ) or interaction ( $F_{1,9} =$   
188  $0.469, p = 0.5110$ ) on the variation in fitness costs among the resistant mutants.

189 *Hitchhiking does not explain the variation in fitness costs*

190 Fourteen of the 16 ampicillin-resistant clones each have a single mutation, while the Ancestor-2  
191 and Ara-5-1 clones have two and three mutations, respectively [17]. In these latter two cases, one  
192 mutation could be responsible for the ampicillin resistance, while the other mutations might be  
193 hitchhikers and potentially deleterious with respect to fitness. We therefore compared the average  
194 fitness costs of resistant clones with and without secondary mutations. The average cost for the  
195 two clones with multiple mutations is higher (26.7%) than for those with a single mutation (8.8%),  
196 though the difference is marginally non-significant (Welch's  $t$ -test,  $t_s = 2.1293$ , 1.6 d.f., one-tailed  
197  $p = 0.0978$ ). However, the small number of cases with multiple mutations limits the power of this  
198 comparison. In any case, we find no compelling evidence that hitchhiking of secondary mutations  
199 explains the variation in fitness among the resistant mutants.

200

201 *Genetic basis for the idiosyncratic variation in fitness costs*

202 Mutations may have idiosyncratic fitness effects [10]. As a consequence, fitness costs could vary  
203 between pathways that confer resistance by different mechanisms, among mutations in different  
204 genes within the same pathway, or even between different mutations in the same gene. To explore  
205 these possibilities, we used previously obtained genomic data [17] to examine the association, if  
206 any, of mutations that arose under ampicillin selection with their corresponding fitness costs.

207 Three resistant clones have mutations in *ompR* (Ancestor-2, Ancestor-3, and Ara-5-1) and  
208 one in *ompF* (Ancestor-4). OmpR is a DNA-binding regulator of the outer-membrane porin OmpF,  
209 which allows various solutes to diffuse into the cell and is often implicated in antibiotic resistance  
210 [17,22,23]. Despite having mutations in the same regulon, these four clones have variable fitness  
211 costs (Figure 1). The *ompR* mutation in the Ara-5-1 clone is associated with one of the highest

212 costs, while the *ompF* mutation in Ancestor-4 is among those without a significant cost. This set  
213 of comparisons is complicated, however, by additional mutations in two of the clones with *ompR*  
214 mutations: Ancestor-2 has a nonsynonymous mutation in *rpoD* (discussed below), while Ara-5-1  
215 has a large amplification affecting many genes and a presumably neutral synonymous mutation  
216 [17]. Further work to make isogenic strains would be required to disentangle which mutations are  
217 responsible for the observed fitness differences. The two clones with single mutations in this  
218 regulon (Ancestor-3 and Ancestor-4, with mutations in *ompR* and *ompF*, respectively) do not have  
219 significantly different fitness costs, given the multiple comparisons (Figure 1), and therefore they  
220 do not shed further light on this issue. However, it should be noted that mutations in *ompR* that  
221 confer tetracycline resistance do, in fact, vary in their fitness costs in the absence of antibiotic [10].

222 Three ampicillin-resistant clones (Ara-5-2, Ara+5-1, Ara+5-3) have IS-mediated deletions  
223 that affect multiple genes including *phoE*, which encodes a porin that allows diffusion of phosphate  
224 and other small anions into the cell [17]. These three mutants have an average fitness cost of ~30%,  
225 which puts them among the clones with the highest costs of resistance (Figure 1). Two other clones  
226 have point mutations in *rpoB* (Ara+4-1) and *rpoD* (Ancestor-2), which encode the RpoB and RpoD  
227 subunits of RNA polymerases, respectively. Both of them are also among those with high costs of  
228 resistance (Figure 1), although as discussed above the clone with the *rpoD* mutation also has a  
229 mutation in *ompR*.

230 Summarizing our inferences to this point, 7 of the 16 ampicillin-resistant mutants exhibit  
231 fitness costs in the absence of drug (Figure 1). All of those 7 have mutations that impact a porin,  
232 an RNA polymerase, or both. By contrast, only one of the 9 clones without a significant reduction  
233 in fitness in the absence of drug has a mutation in those genes or any other that directly impact a  
234 porin or polymerase. (The Ancestor-4 clone, with an *ompF* mutation, is the sole exception.) A

235 Fisher's exact test finds strong support for this putative association between target functions and  
236 fitness costs (two-tailed  $p = 0.0014$ ), although it is admittedly a *post hoc* hypothesis.

237         The 9 clones without significant fitness deficits relative to their sensitive parents all have  
238 single mutations [17]. Besides the *ompF* mutation discussed above (Ancestor-4), two of the clones  
239 (Ara-6-2, Ara-6-3) have deletions that affect *yfiH*, which encodes a conserved protein of unknown  
240 function. Two other clones have amplifications of different genomic regions that affect multiple  
241 genes (Ara-6-1, Ara+4-2). Two clones have mutations affecting genes that encode non-global  
242 regulatory proteins, *marR* (Ara-5-3) and *slyA* (Ara+4-3). Finally, two clones have mutations in  
243 genes that encode proteins involved in synthesis of the cell envelope, *ftsI* (Ancestor-1) and *waaC*  
244 (Ara+5-2). In short, several types of mutations that affect many different target genes confer some  
245 resistance to ampicillin with minimal or no fitness costs in the drug-free environment used here.

246

#### 247 *Summary of results*

248 The ampicillin-resistant mutants in our study grow, on average, about 10% more slowly than their  
249 sensitive progenitors in the absence of antibiotics. However, there is substantial variation among  
250 the resistant clones in their fitness costs (Figure 1). About half show little or no loss of fitness,  
251 while others suffer from deficits of 20% or more. The clones with large deficits have mutations  
252 that impact major outer-membrane proteins or RNA polymerases, while the high-fitness clones  
253 have mutations in a variety of other genes. The fitness costs appear to be unrelated to the extent of  
254 increased resistance conferred by the mutations (Figure 2b). The different genetic backgrounds of  
255 the parent strains do not contribute significantly to the fitness costs, nor do secondary mutations  
256 that may occasionally hitchhike with mutations that confer resistance. Thus, the striking variation

257 in fitness costs among the ampicillin-resistant clones largely reflects the idiosyncratic effects of  
258 the diverse genes and functions affected by the mutations that confer resistance.

259

## 260 **Discussion**

261 In previous work, we investigated how a bacterium's genetic background affects the evolution of  
262 antibiotic resistance, the genetic basis of that resistance, and its associated fitness costs. First, we  
263 examined how readily several *E. coli* strains could overcome prior losses of intrinsic resistance  
264 when challenged with various antibiotics [16]. We found that resistance potential was more limited  
265 in some backgrounds than in others. This result implied that the distinct set of mutations that arose  
266 in each population during its history in the drug-free LTEE environment affected its subsequent  
267 capacity to evolve resistance. Second, we sequenced the genomes of some of the resistant mutants  
268 to assess whether the different founding genotypes took similar or divergent mutational paths to  
269 increased resistance [17]. We found that replicate lines evolved from the same genotype tended to  
270 have more gene-level mutations in common than those derived from different genotypes. Third,  
271 we measured the relative fitness of tetracycline-resistant mutants derived from several parental  
272 strains. We asked whether these mutants were less fit than their parents in the absence of antibiotic,  
273 and whether the cost of resistance was constant or varied among the mutants [10]. The tetracycline-  
274 resistant mutants experienced a reduction in growth rate of ~8%, on average, but with substantial  
275 variation in fitness costs. We showed this heterogeneity reflected, in part, variable costs associated  
276 with different mutations in the same target pathway and sometimes even in the same gene.

277 Here, we extend this work to examine the fitness costs of ampicillin resistance. Ampicillin  
278 and tetracycline inhibit cell-wall and protein synthesis, respectively, and resistance mutations in  
279 the LTEE-derived lines often occurred in different genes for these two drugs [17]. For example, a

280 large IS1-mediated deletion occurred in 3 of the 16 ampicillin-resistant mutants, but in none of the  
281 tetracycline-resistant mutants. This deletion affects multiple genes, including *phoE*, which encodes  
282 the porin PhoE. However, mutations in *ompR* and *ompF* evolved repeatedly under both ampicillin  
283 and tetracycline selection, although they arose more often with tetracycline than with ampicillin  
284 (8/16 and 4/16 mutants, respectively) [17]. The *ompF* gene encodes another porin, OmpF, while  
285 *ompR* encodes a DNA-binding protein that regulates its expression.

286 Resistance was often costly in the absence of these drugs. The ampicillin-resistant mutants  
287 suffered an average reduction in growth rate of ~11% relative to their sensitive progenitors, and  
288 the tetracycline-resistant mutants grew ~8% more slowly [10]. These results are not unexpected  
289 because resistance mutations impact cellular physiology and metabolic pathways, and they may  
290 also increase the energetic burden on a cell through increased expression of some proteins [4–7].  
291 While the average reduction in growth rate was large, there was significant variation in the fitness  
292 cost among the ampicillin-resistant mutants, as we previously saw for the tetracycline-resistant  
293 mutants. As before, we examined several plausible explanations for this heterogeneity.

294 First, we asked whether mutations that confer greater resistance are more costly than those  
295 that confer lesser resistance. If so, then one expects a negative correlation between relative fitness  
296 and the level of resistance, either on an absolute basis or, more importantly, relative to the mutants'  
297 progenitors [21]. There was a negative but non-significant correlation with respect to the former,  
298 and no trend with respect to the latter (Figure 2). We similarly found no support for this hypothesis  
299 in our previous study of tetracycline-resistant mutants [10].

300 Second, the same or similar resistance mutations might have different fitness costs in  
301 different backgrounds [11–15]. For example, Castro and colleagues examined the evolution of  
302 resistance to ofloxacin in nine genetically distinct clinical isolates of *Mycobacterium tuberculosis*

303 [15]. They observed significant differences in the frequency of resistance among these strains, and  
304 they hypothesized that the differences were driven, in part, by the effect of genetic background on  
305 the fitness costs of ofloxacin-resistance mutations. To test this hypothesis, they measured the  
306 fitness of each resistant mutant relative to its sensitive counterpart under drug-free conditions.  
307 They found that the same *gyrA* mutation had significantly different fitness effects in different  
308 genetic backgrounds. In our study, none of the ampicillin-resistant mutants have the exact same  
309 point mutation, and we did not construct isogenic strains. However, three mutants from two  
310 different genetic backgrounds have identical deletions affecting *phoE* and nearby genes, and they  
311 all suffer large fitness costs that are statistically indistinguishable (Figure 1). More broadly, we  
312 also tested for trends in average fitness across the five backgrounds in our study. If the background  
313 affects the average cost of resistance, then we expect less variation between replicate mutants that  
314 evolved from the same parent strain as opposed to different parents. However, genetic background  
315 had no appreciable effect on the average fitness cost, and thus it does not explain the variable costs  
316 associated with the ampicillin resistance.

317 Third, individual resistance mutations may have idiosyncratic effects on fitness [10]. The  
318 cost of resistance might vary for mutations that impact different physiological pathways, among  
319 mutations in different genes within the same pathway, or even between different mutations in the  
320 same gene. In our previous work on tetracycline resistance, we found that mutations in different  
321 genes within the same pathway and different mutations in the same gene contributed significantly  
322 to variation in fitness, even when those mutations occurred in the same genetic background [10].  
323 Specifically, four tetracycline-resistant mutants derived from the LTEE ancestor had significantly  
324 different fitness responses, despite conferring similar levels of resistance [16]. One had a mutation  
325 in *envZ*, whereas the other three had mutations in *ompR*. These genes encode proteins that comprise



326 a two-component regulatory system often associated with increased antibiotic resistance through  
327 altered expression of the porin OmpF [22,23]. Even when we compared two of these ancestor-  
328 derived tetracycline-resistant clones, each with a single mutation in *ompR* and no other mutation,  
329 the variation in fitness remained significant. By contrast, in the present study of ampicillin-resistant  
330 mutants, the variation in fitness costs largely reflects the diverse genes and functions affected by  
331 the mutations that confer resistance. All seven ampicillin-resistant clones with large fitness deficits  
332 (~20%, on average) have mutations that impact porins (*ompR*, *phoE*), RNA polymerases (*rpoB*,  
333 *rpoD*), or both. Only one of the nine clones without a significant fitness cost has a mutation that  
334 impacts either of those functions (*ompF*), while the other eight have mutations that affect a variety  
335 of different functions. Thus, the mutations that confer resistance to both tetracycline and ampicillin  
336 have idiosyncratic effects on fitness. However, the functional level of the idiosyncrasies, or at least  
337 our ability to resolve them given the sample sizes, differs between these two antibiotics.

338         There are many questions about antibiotic resistance that can be examined through the lens  
339 of evolutionary biology. Our work here and elsewhere [10,16,17] explores several issues and their  
340 intersection. First, how repeatable is the evolution of antibiotic resistance, both phenotypically and  
341 genetically, when replicate populations are confronted with the same drug? To what extent does  
342 that repeatability depend on genetic background and thus a lineage's prior evolution? How costly  
343 is resistance to the bacteria in the absence of antibiotic? Is the fitness cost the same for all resistant  
344 mutants, or does it vary among them? If the cost varies, does it depend on the level of resistance  
345 that a mutation confers? Does it depend on the genetic background in which resistance evolved?  
346 Or is the cost idiosyncratic, depending on the particular mutation responsible for the resistance?

347         In our previous work, we first showed that several related *E. coli* strains exhibited subtly  
348 different potential for evolving resistance when exposed to various antibiotics [16]. By sequencing

349 the genomes of the mutants and their parents, we showed that the different genetic backgrounds  
350 subtly varied in their tendencies to evolve resistance by different mutational pathways [17]. In the  
351 present study of ampicillin-resistant mutants, and in our previous analysis of tetracycline-resistant  
352 mutants [10], we measured the fitness costs of the evolved resistance in the absence of these drugs.  
353 In both studies, we found that resistant mutants were, on average, much less fit than their parents.  
354 Moreover, in both studies we found the cost of resistance varied significantly among mutants. In  
355 neither study, however, was the cost significantly correlated with the level of increased resistance,  
356 nor did the cost vary significantly across genetic backgrounds. Instead, in both studies, the cost of  
357 resistance was idiosyncratic—that is, it varied depending on the particular mutation—although the  
358 details differ between the two antibiotics. For tetracycline resistance, some of the variation in costs  
359 resulted from different mutations even in the same target gene [10]; for ampicillin resistance, the  
360 variation in costs largely reflects mutations in different sets of genes that were either very costly  
361 or nearly cost-free in the absence of drug. The variability in the fitness cost of resistance mutations,  
362 as well as the diverse sources of that variation, illustrates some of the complexities associated with  
363 antibiotic resistance and underscores the importance of avoiding generalizations when it comes to  
364 evolutionary expectations.

365

## 366 **Acknowledgments**

367 We thank Devin Lake for assistance in the laboratory. We acknowledge support from an HHMI  
368 Hanna Gray Fellowship (to K.J.C.); an NSF grant (DEB-1951307 to R.E.L.); a USDA Hatch grant  
369 (MICL02253 to R.E.L.); and the BEACON Center for the Study of Evolution in Action (NSF  
370 cooperative agreement DBI-0939454).

371

372 **Data Availability**

373 All data and analysis code for this study are available on GitHub

374 (<https://github.com/KyleCard/LTEE-ampicillin-fitness-costs>).

## 375 References

- 376 1. Wohlleben, W.; Mast, Y.; Stegmann, E.; Ziemert, N. Antibiotic drug discovery. *Microb.*  
377 *Biotechnol.* **2016**, *9*, 541–548, doi:10.1111/1751-7915.12388.  
378
- 379 2. Sanchez, G.V.; Fleming-Dutra, K.E.; Roberts, R.M.; Hicks, L.A. Core elements of  
380 outpatient antibiotic stewardship. *Morb. Mortal. Wkly. Rep. Recomm. Reports* **2016**, *65*, 1–  
381 12, doi:10.15585/mmwr.rr6506a1.  
382
- 383 3. Baquero, F.; Martínez, J.L.; Lanza, V.F.; Rodríguez-Beltrán, J.; Galán, J.C.; San Millán, A.;  
384 Cantón, R.; Coque, T.M. Evolutionary pathways and trajectories in antibiotic resistance.  
385 *Clin. Microbiol. Rev.* **2021**, *34*, e00050-19, doi:10.1128/cmr.00050-19.  
386
- 387 4. Lenski, R.E.; Bouma, J.E. Effects of segregation and selection on instability of plasmid  
388 pACYC184 in *Escherichia coli* B. *J. Bacteriol.* **1987**, *169*, 5314–5316,  
389 doi:10.1128/jb.169.11.5314-5316.1987.  
390
- 391 5. Nguyen, T.N.M.; Phan, Q.G.; Duong, L.P.; Bertrand, K.P.; Lenski, R.E. Effects of carriage  
392 and expression of the Tn10 tetracycline-resistance operon on the fitness of *Escherichia coli*  
393 K12. *Mol. Biol. Evol.* **1989**, *6*, 213–225, doi:10.1093/oxfordjournals.molbev.a040545.  
394
- 395 6. Andersson, D.I.; Hughes, D. Antibiotic resistance and its cost: is it possible to reverse  
396 resistance? *Nat. Rev. Microbiol.* **2010**, *8*, 260–271, doi:10.1038/nrmicro2319.  
397
- 398 7. Vogwill, T.; MacLean, R.C. The genetic basis of the fitness costs of antimicrobial  
399 resistance: a meta-analysis approach. *Evol. Appl.* **2015**, *8*, 284–295, doi:10.1111/eva.12202.  
400
- 401 8. Hughes, D.; Andersson, D.I. Evolutionary trajectories to antibiotic resistance. *Annu. Rev.*  
402 *Microbiol.* **2017**, *71*, 579–596, doi:10.1146/annurev-micro-090816-093813.  
403
- 404 9. Santos-Lopez, A.; Marshall, C.W.; Scribner, M.R.; Snyder, D.J.; Cooper, V.S. Evolutionary  
405 pathways to antibiotic resistance are dependent upon environmental structure and bacterial  
406 lifestyle. *eLife* **2019**, *8*, e47612, doi:10.7554/eLife.47612.  
407
- 408 10. Card, K.J.; Jordan, J.A.; Lenski, R.E. Idiosyncratic variation in the fitness costs of  
409 tetracycline-resistance mutations in *Escherichia coli*. *Evolution* **2021**, *75*, 1230–1238,  
410 doi:10.1111/evo.14203.  
411
- 412 11. Vogwill, T.; Kojadinovic, M.; MacLean, R.C. Epistasis between antibiotic resistance  
413 mutations and genetic background shape the fitness effect of resistance across species of  
414 *Pseudomonas*. *Proc. R. Soc. B* **2016**, *283*, 20160151, doi:10.1098/rspb.2016.0151.  
415
- 416 12. Knopp, M.; Andersson, D.I. Predictable phenotypes of antibiotic resistance mutations. *mBio*  
417 **2018**, *9*, e00770-18, doi:10.1128/mBio.00770-18.  
418
- 419 13. Yokoyama, M.; Stevens, E.; Laabei, M.; Bacon, L.; Heesom, K.; Bayliss, S.; Ooi, N.;

- 420 O'Neill, A.J.; Murray, E.; Williams, P.; et al. Epistasis analysis uncovers hidden antibiotic  
421 resistance-associated fitness costs hampering the evolution of MRSA. *Genome Biol.* **2018**,  
422 *19*, 94, doi:10.1186/s13059-018-1469-2.  
423
- 424 14. Apjok, G.; Boross, G.; Nyerges, Á.; Fekete, G.; Lázár, V.; Papp, B.; Pál, C.; Csörgo, B.  
425 Limited evolutionary conservation of the phenotypic effects of antibiotic resistance  
426 mutations. *Mol. Biol. Evol.* **2019**, *36*, 1601–1611, doi:10.1093/molbev/msz109.  
427
- 428 15. Castro, R.A.D.; Ross, A.; Kamwela, L.; Reinhard, M.; Loiseau, C.; Feldmann, J.; Borrell,  
429 S.; Trauner, A.; Gagneux, S. The genetic background modulates the evolution of  
430 fluoroquinolone-resistance in *Mycobacterium tuberculosis*. *Mol. Biol. Evol.* **2020**, *37*, 195–  
431 207, doi:10.1093/molbev/msz214.  
432
- 433 16. Card, K.J.; LaBar, T.; Gomez, J.B.; Lenski, R.E. Historical contingency in the evolution of  
434 antibiotic resistance after decades of relaxed selection. *PLoS Biol.* **2019**, *17*, e3000397,  
435 doi:10.1371/journal.pbio.3000397.  
436
- 437 17. Card, K.J.; Thomas, M.D.; Graves, J.L.; Barrick, J.E.; Lenski, R.E. Genomic evolution of  
438 antibiotic resistance is contingent on genetic background following a long-term experiment  
439 with *Escherichia coli*. *Proc. Natl. Acad. Sci.* **2021**, *118*, e2016886118,  
440 doi:10.1073/pnas.2016886118.  
441
- 442 18. Lenski, R.E.; Rose, M.R.; Simpson, S.C.; Tadler, S.C. Long-term experimental evolution  
443 in *Escherichia coli*. I. Adaptation and divergence during 2,000 generations. *Am. Nat.* **1991**,  
444 *138*, 1315–1341, doi:10.1086/285289.  
445
- 446 19. Wisser, M.J.; Ribeck, N.; Lenski, R.E. Long-term dynamics of adaptation in asexual  
447 populations. *Science* **2013**, *342*, 1364–1367, doi:10.1126/science.1243357.  
448
- 449 20. Lenski, R.E.; Wisser, M.J.; Ribeck, N.; Blount, Z.D.; Nahum, J.R.; Morris, J.J.; Zaman, L.;  
450 Turner, C.B.; Wade, B.D.; Maddamsetti, R.; et al. Sustained fitness gains and variability in  
451 fitness trajectories in the long-term evolution experiment with *Escherichia coli*. *Proc. R.*  
452 *Soc. B* **2015**, doi:10.1098/rspb.2015.2292.  
453
- 454 21. Melnyk, A.H.; Wong, A.; Kassen, R. The fitness costs of antibiotic resistance mutations.  
455 *Evol. Appl.* **2015**, *8*, 273–283, doi:10.1111/eva.12196.  
456
- 457 22. Chakraborty, S.; Kenney, L.J. A new role of OmpR in acid and osmotic stress in *Salmonella*  
458 and *E. coli*. *Front. Microbiol.* **2018**, *9*, doi:10.3389/fmicb.2018.02656.  
459
- 460 23. Choi, U.; Lee, C.-R. Distinct roles of outer membrane porins in antibiotic resistance and  
461 membrane integrity in *Escherichia coli*. *Front. Microbiol.* **2019**, *10*, 953,  
462 doi:10.3389/fmicb.2019.00953.  
463

465 **Table S1.** Bacterial strains used in this study.

466

467

468

469

| <b>Evolved ampicillin-resistant clones</b>   |                        |                   |
|----------------------------------------------|------------------------|-------------------|
| <b>Strain name</b>                           | <b>Derived from</b>    | <b>Freezer ID</b> |
| Ancestor-1                                   | REL606                 | KJC108            |
| Ancestor-2                                   | REL606                 | KJC109            |
| Ancestor-3                                   | REL606                 | KJC110            |
| Ancestor-4                                   | REL606                 | KJC111            |
| Ara-5-1                                      | REL11339               | KJC114            |
| Ara-5-2                                      | REL11339               | KJC122            |
| Ara-5-3                                      | REL11339               | KJC130            |
| Ara-6-1                                      | REL11389               | KJC115            |
| Ara-6-2                                      | REL11389               | KJC123            |
| Ara-6-3                                      | REL11389               | KJC131            |
| Ara+4-1                                      | REL11348               | KJC112            |
| Ara+4-2                                      | REL11348               | KJC120            |
| Ara+4-3                                      | REL11348               | KJC128            |
| Ara+5-1                                      | REL11367               | KJC113            |
| Ara+5-2                                      | REL11367               | KJC121            |
| Ara+5-3                                      | REL11367               | KJC129            |
| <b>Ampicillin-sensitive parental strains</b> |                        |                   |
| <b>LTEE population</b>                       | <b>LTEE generation</b> | <b>Freezer ID</b> |
| Ancestor                                     | 0                      | REL606            |
| Ara-5                                        | 50,000                 | REL11339          |
| Ara-6                                        | 50,000                 | REL11389          |
| Ara+4                                        | 50,000                 | REL11348          |
| Ara+5                                        | 50,000                 | REL11367          |
| <b>Strains used as common competitors</b>    |                        |                   |
| <b>LTEE population</b>                       | <b>LTEE generation</b> | <b>Freezer ID</b> |
| Ancestor                                     | 0                      | REL607            |
| Ara-5                                        | 40,000                 | REL10948          |
| Ara-5                                        | 40,000                 | REL11638          |
